# Supplementary material for: Anthrax infection inhibits the AKT signaling involved in the E-cadherin-mediated adhesion of lung epithelial cells
Source: PubMed Central journal article supplement (PMC2734923; doi:10.1111/j.1574-695x.2009.00558.x), 2009-07

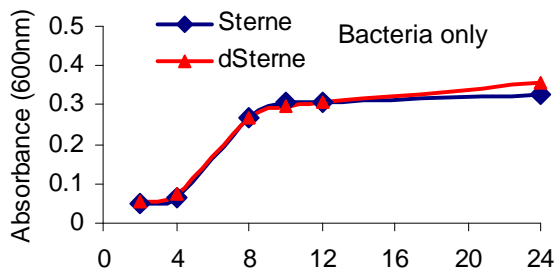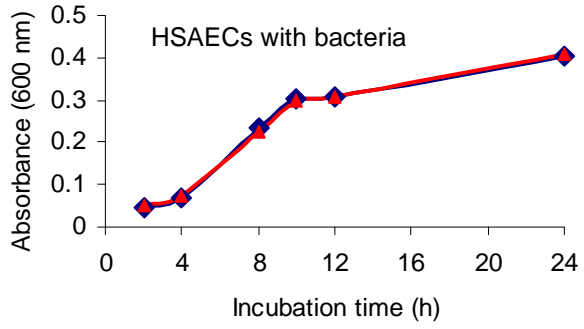

Supplement: fim0056-0129-SD1.pdf [file fim0056-0129-SD1.pdf]
